# Supplementary material for: How Healthy Are Health-Related Behaviors in University Students: The HOLISTic Study
Source: MDPI journal article supplement (doi:10.3390/nu13020675), 2021-02-19
Supplement: s1 [file s1]

**Table S1.** Description of the sample included in the HOLISTic study (Habits, orthorexia nervosa and lifestyle in university students).

| Country | University (Ethical approval)                                                                                          | Course/study program (year of data collection)                  | Course year | Total N of students enrolled | Response rate (%) | Method of data collection |
|---------|------------------------------------------------------------------------------------------------------------------------|-----------------------------------------------------------------|-------------|------------------------------|-------------------|---------------------------|
| Croatia | University of Split* (Ethics Committee of the University of Split School of Medicine; Reg. No: 2181-198-03-04-18-0027) | Medicine (2018)                                                 | 1           | 90                           | 92.2              | Paper-based survey        |
|         |                                                                                                                        |                                                                 | 2           | 87                           | 83.9              |                           |
|         |                                                                                                                        |                                                                 | 3           | 96                           | 83.3              |                           |
|         |                                                                                                                        |                                                                 | 4           | 90                           | 85.6              |                           |
|         |                                                                                                                        |                                                                 | 5           | 73                           | 76.7              |                           |
|         |                                                                                                                        |                                                                 | 6           | 90                           | 75.6              |                           |
|         |                                                                                                                        | Medicine (2019)                                                 | 1           | 90                           | 82.2              | Paper-based survey        |
|         |                                                                                                                        |                                                                 | 5           | 80                           | 90.0              |                           |
|         |                                                                                                                        |                                                                 | 6           | 69                           | 97.1              |                           |
|         |                                                                                                                        | Dental medicine (2018)                                          | 1           | 204                          | 94.3              | Online survey             |
|         |                                                                                                                        |                                                                 | 2           | 42                           | 88.1              |                           |
|         |                                                                                                                        |                                                                 | 3           | 33                           | 75.8              |                           |
|         |                                                                                                                        |                                                                 | 4           | 27                           | 88.9              |                           |
|         |                                                                                                                        |                                                                 | 5           | 44                           | 84.1              |                           |
|         |                                                                                                                        |                                                                 | 6           | 23                           | 69.6              |                           |
|         |                                                                                                                        | Pharmacy (2018)                                                 | 1           | 30                           | 86.7              | Online survey             |
|         |                                                                                                                        |                                                                 | 2           | 28                           | 96.4              |                           |
|         |                                                                                                                        |                                                                 | 3           | 29                           | 75.9              |                           |
|         |                                                                                                                        |                                                                 | 4           | 31                           | 93.6              |                           |
|         |                                                                                                                        |                                                                 | 5           | 31                           | 83.9              |                           |
|         |                                                                                                                        | Nursing, radiology technology, lab technology, midwifery (2019) | 1-3         | 390                          | 77.7              | Paper-based survey        |

|       |                                                         |                                   |     |                                                         |      |                    |
|-------|---------------------------------------------------------|-----------------------------------|-----|---------------------------------------------------------|------|--------------------|
|       |                                                         | Economy (2018)                    | 1-3 | 374                                                     | 40.6 |                    |
| Italy | University of Pavia (local ethical approval not needed) | Medicine and surgery (2018-2019)  | 1   | 141                                                     | 70.5 | Paper-based survey |
|       |                                                         |                                   | 2   | 47                                                      | 24.6 |                    |
|       |                                                         |                                   | 3   | 77                                                      | 32.6 |                    |
|       |                                                         |                                   | 4   | 85                                                      | 11.3 |                    |
|       |                                                         |                                   | 5   | 8                                                       | 4.3  |                    |
|       |                                                         |                                   | 6   | 26                                                      | 7.2  |                    |
|       |                                                         | Physiotherapy (2018)              | 7   | 11                                                      | 33.3 |                    |
|       |                                                         |                                   | 8   | 19                                                      | 44.2 |                    |
|       |                                                         | Neurodevelopmental therapy (2018) | 1   | 9                                                       | 19.0 |                    |
|       |                                                         | Orthotics and prosthetics (2018)  | 1   | 15                                                      | 35   |                    |
|       |                                                         | Nursing (2019)                    | 1   | 99                                                      | 47.6 |                    |
|       |                                                         |                                   | 2   | 133                                                     | 67.7 |                    |
|       |                                                         |                                   | 3   | 63                                                      | 36.1 |                    |
|       |                                                         |                                   | -   | Course year information was not reported by 52 students | na   |                    |
|       |                                                         | Dentistry (2019)                  | 1   | 19                                                      | 63.3 |                    |
|       |                                                         |                                   | 2   | 10                                                      | 20.0 |                    |
|       |                                                         |                                   | 3   | 15                                                      | 88.2 |                    |
|       |                                                         |                                   | 4   | 14                                                      | 77.8 |                    |
|       |                                                         |                                   | 5   | 6                                                       | 42.9 |                    |
|       |                                                         | Obstetrics (2019)                 | 1   | 16                                                      | 84.2 |                    |
|       |                                                         |                                   | 2   | 13                                                      | 81.2 |                    |

|         |                                                             |                                                                |     |                                                        |       |                                      |
|---------|-------------------------------------------------------------|----------------------------------------------------------------|-----|--------------------------------------------------------|-------|--------------------------------------|
|         |                                                             |                                                                | -   | Course year information was not reported by 2 students | na    |                                      |
|         |                                                             |                                                                | 3   | 17                                                     | 85.0  |                                      |
|         | University of Foggia (local ethical approval not needed)    | Medicine and surgery (2018-2019)                               | 1-6 | 597                                                    | 67.5  | Online survey and paper-based survey |
|         |                                                             | Nursing studies (2018-2019)                                    | 1-3 | 337                                                    | 62.6  |                                      |
|         |                                                             | Biomedical laboratory techniques (2018-2019)                   | 1-4 | 62                                                     | 82.3  |                                      |
|         |                                                             | Biomoleculars sciences and technology (2018-2019)              | 1-2 | 47                                                     | 100.0 |                                      |
|         |                                                             | Dietetics (2018-2019)                                          | 1-4 | 51                                                     | 100.0 |                                      |
|         |                                                             | Physiotherapy (2018-2019)                                      | 1-3 | 100                                                    | 90.0  |                                      |
|         |                                                             | Sport sciences, physical exercise and human health (2018-2019) | 1-5 | 235                                                    | 80.4  |                                      |
|         |                                                             | Dentistry and dental implants (2018-2019)                      | 1-6 | 214                                                    | 100.0 |                                      |
|         |                                                             | Business administration (Bachelor degree) (2018-2019)          | 1-3 | 741                                                    | 62.4  |                                      |
|         |                                                             | Economics (bachelor degree) (2018-2019)                        | 1-3 | 479                                                    | 63.3  |                                      |
|         |                                                             | Marketing management (2018-2019)                               | 1-5 | 95                                                     | 67.4  |                                      |
|         |                                                             | Economics and finance (2018-2019)                              | 1-5 | 59                                                     | 86.4  |                                      |
|         |                                                             | Business administration (master degree) (2018-2019)            | 1-5 | 201                                                    | 93.5  |                                      |
| Lebanon | Beirut Arab University (IRB Approval: 2019H-0089-HS-R-0327) | Nutrition & Dietetics (2019-2020)                              | 1   | 50                                                     | 96.0  | Paper-based survey                   |
|         |                                                             |                                                                | 2   | 26                                                     | 65.4  |                                      |
|         |                                                             |                                                                | 3   | 44                                                     | 84.1  |                                      |
|         |                                                             | Physical Therapy (2019)                                        | 1   | 68                                                     | 80.9  |                                      |

|         |                                                                                                                                                                              |                                                        |   |     |       |                       |
|---------|------------------------------------------------------------------------------------------------------------------------------------------------------------------------------|--------------------------------------------------------|---|-----|-------|-----------------------|
|         |                                                                                                                                                                              |                                                        | 2 | 37  | 64.9  |                       |
|         |                                                                                                                                                                              |                                                        | 3 | 23  | 43.5  |                       |
|         |                                                                                                                                                                              |                                                        | 4 | 53  | 11.3  |                       |
|         |                                                                                                                                                                              | Nursing (2019)                                         | 1 | 75  | 93.3  |                       |
|         |                                                                                                                                                                              |                                                        | 2 | 34  | 94.1  |                       |
|         |                                                                                                                                                                              |                                                        | 3 | 21  | 81.0  |                       |
|         |                                                                                                                                                                              | Medicine (2019)                                        | 1 | 135 | 25.2  |                       |
|         |                                                                                                                                                                              |                                                        | 2 | 117 | 23.1  |                       |
|         |                                                                                                                                                                              | Dentistry (2019)                                       | 2 | 87  | 27.6  |                       |
| Poland  | University of Wroclaw<br>(Ethics Committee of the<br>Faculty of Psychology in<br>Katowice at the SWPS<br>University of Social Sciences<br>and Humanities;<br>WKEB56/04/2019) | Medicine (2019)                                        |   | 82  | 85    | Online survey         |
|         |                                                                                                                                                                              | Social Sciences (e.g. psychology, sociology)<br>(2019) | 4 | 101 | 92    |                       |
|         |                                                                                                                                                                              | Sciences (2019)                                        | 3 | 62  | 84    |                       |
| Romania | University of Agricultural<br>Sciences and Veterinary<br>Medicine, Cluj-Napoca (local<br>ethical approval not needed)                                                        | Food science (2020)                                    | 4 | 110 | 9     | Online survey         |
|         |                                                                                                                                                                              | Environmental engineering (2020)                       | 4 | 34  | 18    |                       |
|         |                                                                                                                                                                              | Veterinary medicine (2019-2020)                        | 1 | 286 | 8     |                       |
|         |                                                                                                                                                                              |                                                        | 4 | 231 | 5     |                       |
|         |                                                                                                                                                                              |                                                        | 6 | 183 | 81    |                       |
|         |                                                                                                                                                                              | Engineering and management (2020)                      | 4 | 19  | 42    |                       |
| Spain   | Universidad Pablo de<br>Olavide, Sevilla (Ethics<br>Committee of the Pablo de<br>Olavide University; PEIBA                                                                   | Human Nutrition & Dietetics (2020)                     | 1 | 62  | 51.6  | Paper-based<br>survey |
|         |                                                                                                                                                                              |                                                        | 2 | 64  | 76.5  |                       |
|         |                                                                                                                                                                              |                                                        | 3 | 56  | 82.1  |                       |
|         |                                                                                                                                                                              |                                                        | 4 | 62  | 100.0 |                       |

|        |                                                                                                            |                             |   |     |      |                       |
|--------|------------------------------------------------------------------------------------------------------------|-----------------------------|---|-----|------|-----------------------|
|        | reference number<br>20191118143720)                                                                        | Sport Sciences (2020)       | 1 | 144 | 72.9 |                       |
|        |                                                                                                            |                             | 2 | 150 | 38.6 |                       |
|        |                                                                                                            |                             | 3 | 135 | 75.5 |                       |
|        |                                                                                                            |                             | 4 | 222 | 36.4 |                       |
| Turkey | Koç University, Istanbul<br>(Ethics Committee of the Koç<br>University; Protocol No:<br>2018.242.IRB3.169) | Medicine and surgery (2018) | 1 | 30  | 52.0 | Paper-based<br>survey |
|        |                                                                                                            |                             | 2 | 25  |      |                       |
|        |                                                                                                            |                             | 3 | 28  |      |                       |
|        |                                                                                                            |                             | 4 | 18  |      |                       |
|        |                                                                                                            |                             | 5 | 24  |      |                       |
|        |                                                                                                            |                             | 6 | 17  |      |                       |
|        |                                                                                                            | Nursing (2018)              | 1 | 16  | 91.6 |                       |
|        |                                                                                                            |                             | 2 | 21  |      |                       |
|        |                                                                                                            |                             | 4 | 29  |      |                       |

Legend. \*Coordinator of the study; na – not applicable.

**Table S2.** Questionnaires filled in by the students in the HOLISTic study.

|                                  | General information            | Dietary habits  | Eating behaviour |                 |          | Lifestyle and nutrition knowledge | Physical activity        | Sleeping habits and screen-time | Perceived level of stress /quality of life |
|----------------------------------|--------------------------------|-----------------|------------------|-----------------|----------|-----------------------------------|--------------------------|---------------------------------|--------------------------------------------|
| Country<br>(Language of courses) | Questions                      | Questions       | MDSS [20]        | ORTO-15 [22-25] | EHQ [21] | Questions                         | IPAQ [26,27] /questions  | Questions                       | PSS [28,29] /questions                     |
| <b>Croatia<br/>(Croatian)</b>    | Open-ended/<br>multiple-choice | Multiple-choice | FBT              | FBT             | FBT      | Open-ended/<br>multiple-choice    | IPAQ/<br>multiple-choice | Open-ended/<br>multiple-choice  | FBT/<br>Open-ended/<br>multiple-choice     |
| <b>Italy<br/>(Italian)</b>       | Open-ended/<br>multiple-choice | Multiple-choice | FBT              | ORTO-15         | FBT      | Open-ended/<br>multiple-choice    | IPAQ/<br>multiple-choice | Open-ended/<br>multiple-choice  | FBT/<br>Open-ended/<br>multiple-choice     |
| <b>Lebanon<br/>(English)</b>     | Open-ended/<br>multiple-choice | Multiple-choice | MDSS             | ORTO-15         | EHQ      | Open-ended/<br>multiple-choice    | IPAQ/<br>multiple-choice | Open-ended/<br>multiple-choice  | PSS-10/<br>Open-ended/<br>multiple-choice  |
| <b>Turkey<br/>(English)</b>      | Open-ended/<br>multiple-choice | Multiple-choice | MDSS             | ORTO-15         | EHQ      | Open-ended/<br>multiple-choice    | IPAQ/<br>multiple-choice | Open-ended/<br>multiple-choice  | PSS-10/<br>Open-ended/<br>multiple-choice  |
| <b>Spain<br/>(Spanish)</b>       | Open-ended/<br>multiple-choice | Multiple-choice | FBT              | ORTO-11         | FBT      | Open-ended/<br>multiple-choice    | IPAQ/<br>multiple-choice | Open-ended/<br>multiple-choice  | PSS-14                                     |
| <b>Poland<br/>(Polish)</b>       | Open-ended/<br>multiple-choice | Multiple-choice | FBT              | ORTO-15         | FBT      | Open-ended/<br>multiple-choice    | IPAQ/<br>multiple-choice | Open-ended/<br>multiple-choice  | FBT/<br>Open-ended/<br>multiple-choice     |

|                              |                                |                     |      |         |     |                                |                          |                                |                                            |
|------------------------------|--------------------------------|---------------------|------|---------|-----|--------------------------------|--------------------------|--------------------------------|--------------------------------------------|
| <b>Romania<br/>(English)</b> | Open-ended/<br>multiple-choice | Multiple-<br>choice | MDSS | ORTO-15 | EHQ | Open-ended/<br>multiple-choice | IPAQ/<br>multiple-choice | Open-ended/<br>multiple-choice | PSS-10/Open-<br>ended/ multiple-<br>choice |
|------------------------------|--------------------------------|---------------------|------|---------|-----|--------------------------------|--------------------------|--------------------------------|--------------------------------------------|

Legend. FBT - forward-back-translation [19].

**Table S3.** Post-hoc P values for between-countries comparison of the overall lifestyle characteristics of students, corresponding to the analysis presented in Table 1.

|                                                             | Post-hoc P <sup>†</sup>                                                                                                                                                                                                                                                                                                                                                                                                                                                                                                                                                                                                                                                    |
|-------------------------------------------------------------|----------------------------------------------------------------------------------------------------------------------------------------------------------------------------------------------------------------------------------------------------------------------------------------------------------------------------------------------------------------------------------------------------------------------------------------------------------------------------------------------------------------------------------------------------------------------------------------------------------------------------------------------------------------------------|
| Age (years)<br>median (IQR)                                 | <0.001 <sup>12</sup> ; 0.006 <sup>13</sup> ; <0.001 <sup>14</sup> ; <0.001 <sup>15</sup> ; <0.001 <sup>16</sup> ; 0.162 <sup>17</sup> ;<br>0.026 <sup>18</sup> ; <0.001 <sup>23</sup> ; <0.001 <sup>24</sup> ; <0.001 <sup>25</sup> ; <0.001 <sup>26</sup> ;<br><0.001 <sup>27</sup> ; <0.001 <sup>28</sup> ; <0.001 <sup>34</sup> ; <0.001 <sup>35</sup> ; <0.001 <sup>36</sup> ;<br>0.304 <sup>37</sup> ; 0.735 <sup>38</sup> ; <0.001 <sup>45</sup> ; <0.001 <sup>46</sup> ; <0.001 <sup>47</sup> ; <0.001 <sup>48</sup> ;<br><0.001 <sup>56</sup> ; <0.001 <sup>57</sup> ; <0.001 <sup>58</sup> ; <0.001 <sup>67</sup> ; <0.001 <sup>68</sup> ;<br>0.265 <sup>78</sup> |
| Female<br>gender<br>n (%)                                   | <0.001 <sup>12</sup> ; <0.001 <sup>13</sup> ; <0.001 <sup>14</sup> ; <0.131 <sup>15</sup> ; <0.194 <sup>16</sup> ;<br><0.001 <sup>17</sup> ; <0.001 <sup>18</sup> ; <0.001 <sup>23</sup> ; 0.001 <sup>24</sup> ; <0.001 <sup>25</sup> ;<br><0.001 <sup>26</sup> ; <0.001 <sup>27</sup> ; 0.078 <sup>28</sup> ; 0.096 <sup>34</sup> ; <0.001 <sup>35</sup> ; 0.207 <sup>36</sup> ;<br><0.001 <sup>37</sup> ; 0.048 <sup>38</sup> ; <0.001 <sup>45</sup> ; 0.022 <sup>46</sup> ; <0.001 <sup>47</sup> ; 0.548 <sup>48</sup> ;<br>0.032 <sup>56</sup> ; <0.001 <sup>57</sup> ; <0.001 <sup>58</sup> ; <0.001 <sup>67</sup> ; 0.011 <sup>68</sup> ; <0.001 <sup>78</sup>       |
| Grade point<br>average<br>(percentile)<br>median (IQR)      | 0.097 <sup>12</sup> ; <0.001 <sup>13</sup> ; 0.007 <sup>14</sup> ; <0.001 <sup>15</sup> ; 0.014 <sup>16</sup> ; <0.001 <sup>17</sup> ;<br><0.001 <sup>18</sup> ; 0.931 <sup>23</sup> ; <0.001 <sup>24</sup> ; <0.001 <sup>25</sup> ; 0.072 <sup>26</sup> ; <0.001 <sup>27</sup> ;<br><0.001 <sup>28</sup> ; <0.001 <sup>34</sup> ; <0.001 <sup>35</sup> ; 0.051 <sup>36</sup> ; <0.001 <sup>37</sup> ;<br><0.001 <sup>38</sup> ; <0.001 <sup>45</sup> ; <0.001 <sup>46</sup> ; 0.006 <sup>47</sup> ; 0.001 <sup>48</sup> ; <0.001 <sup>56</sup> ;<br><0.001 <sup>57</sup> ; <0.001 <sup>58</sup> ; <0.001 <sup>67</sup> ; <0.001 <sup>68</sup> ; 0.004 <sup>78</sup>       |
| Smoking n<br>(%)<br>yes<br>ex-smokers<br>never smoked       | <0.001 <sup>12</sup> ; <0.001 <sup>13</sup> ; 0.028 <sup>14</sup> ; 0.679 <sup>15</sup> ; <0.001 <sup>16</sup> ; <0.001 <sup>17</sup> ;<br>0.074 <sup>18</sup> ; 0.083 <sup>23</sup> ; <0.060 <sup>24</sup> ; <0.001 <sup>25</sup> ; <0.001 <sup>26</sup> ; <0.001 <sup>27</sup> ;<br>0.230 <sup>28</sup> ; 0.030 <sup>34</sup> ; <0.001 <sup>35</sup> ; <0.001 <sup>36</sup> ; <0.001 <sup>37</sup> ; 0.548 <sup>38</sup> ;<br>0.062 <sup>45</sup> ; 0.004 <sup>46</sup> ; <0.001 <sup>47</sup> ; 0.462 <sup>48</sup> ; 0.049 <sup>56</sup> ; <0.001 <sup>57</sup> ;<br>0.051 <sup>58</sup> ; <0.001 <sup>67</sup> ; 0.001 <sup>68</sup> ; 0.002 <sup>78</sup>            |
| BMI (kg/m <sup>2</sup> )<br>median (IQR)                    | <0.001 <sup>12</sup> ; <0.001 <sup>13</sup> ; <0.001 <sup>14</sup> ; 0.004 <sup>15</sup> ; 0.094 <sup>16</sup> ; <0.001 <sup>17</sup> ;<br>0.862 <sup>18</sup> ; <0.001 <sup>23</sup> ; <0.001 <sup>24</sup> ; <0.001 <sup>25</sup> ; 0.013 <sup>26</sup> ; <0.001 <sup>27</sup> ;<br><0.001 <sup>28</sup> ; <0.001 <sup>34</sup> ; 0.541 <sup>35</sup> ; <0.001 <sup>36</sup> ; <0.001 <sup>37</sup> ; 0.001 <sup>38</sup> ;<br><0.001 <sup>45</sup> ; 0.002 <sup>46</sup> ; <0.001 <sup>47</sup> ; <0.001 <sup>48</sup> ; 0.002 <sup>56</sup> ; <0.001 <sup>57</sup> ;<br>0.037 <sup>58</sup> ; 0.584 <sup>67</sup> ; 0.292 <sup>68</sup> ; 0.051 <sup>78</sup>          |
| Self-rated<br>health<br>perception<br>median (IQR)          | <0.001 <sup>12</sup> ; <0.001 <sup>13</sup> ; <0.001 <sup>14</sup> ; 0.007 <sup>15</sup> ; <0.001 <sup>16</sup> ; 0.010 <sup>17</sup> ;<br><0.001 <sup>18</sup> ; 0.001 <sup>23</sup> ; <0.001 <sup>24</sup> ; <0.001 <sup>25</sup> ; 0.308 <sup>26</sup> ; 0.010 <sup>27</sup> ;<br><0.001 <sup>28</sup> ; 0.001 <sup>34</sup> ; <0.001 <sup>35</sup> ; 0.392 <sup>36</sup> ; <0.001 <sup>37</sup> ; 0.012 <sup>38</sup> ;<br>0.156 <sup>45</sup> ; 0.003 <sup>46</sup> ; <0.001 <sup>47</sup> ; 0.881 <sup>48</sup> ; <0.001 <sup>56</sup> ; <0.001 <sup>57</sup> ;<br>0.148 <sup>58</sup> ; 0.012 <sup>67</sup> ; 0.010 <sup>68</sup> ; <0.001 <sup>78</sup>            |
| Breakfast<br>daily<br>n (%)                                 | <0.001 <sup>12</sup> ; <0.001 <sup>13</sup> ; <0.001 <sup>14</sup> ; <0.001 <sup>15</sup> ; 0.001 <sup>16</sup> ;<br><0.001 <sup>17</sup> ; <0.001 <sup>18</sup> ; 0.776 <sup>23</sup> ; <0.001 <sup>24</sup> ; <0.001 <sup>25</sup> ;<br><0.001 <sup>26</sup> ; 0.010 <sup>27</sup> ; <0.001 <sup>28</sup> ; 0.001 <sup>34</sup> ; <0.001 <sup>35</sup> ; <0.001 <sup>36</sup> ;<br><0.001 <sup>37</sup> ; <0.001 <sup>38</sup> ; <0.001 <sup>45</sup> ; 0.786 <sup>46</sup> ; <0.001 <sup>47</sup> ; 0.129 <sup>48</sup> ;<br><0.001 <sup>56</sup> ; 0.950 <sup>57</sup> ; <0.001 <sup>58</sup> ; <0.001 <sup>67</sup> ; 0.269 <sup>68</sup> ; <0.001 <sup>78</sup>      |
| ORTO-15<br>score<br>median (IQR)                            | <0.001 <sup>12</sup> ; <0.001 <sup>13</sup> ; <0.001 <sup>14</sup> ; <0.001 <sup>15</sup> ; 0.569 <sup>16</sup> ; .17;<br>0.407 <sup>18</sup> ; <0.001 <sup>23</sup> ; <0.001 <sup>24</sup> ; <0.001 <sup>25</sup> ; 0.018 <sup>26</sup> ; .27;<br><0.001 <sup>28</sup> ; 0.359 <sup>34</sup> ; 0.002 <sup>35</sup> ; 0.001 <sup>36</sup> ; .37; 0.125 <sup>38</sup> ; 0.043 <sup>45</sup> ;<br>0.001 <sup>46</sup> ; .47; 0.052 <sup>48</sup> ; <0.001 <sup>56</sup> ; .57; 0.002 <sup>58</sup> ; .67; 0.292 <sup>68</sup> ; -<br>78                                                                                                                                      |
| MDSS score<br>median (IQR)                                  | <0.001 <sup>12</sup> ; <0.001 <sup>13</sup> ; 0.944 <sup>14</sup> ; 0.819 <sup>15</sup> ; <0.001 <sup>16</sup> ; <0.001 <sup>17</sup> ;<br>0.053 <sup>18</sup> ; <0.001 <sup>23</sup> ; <0.001 <sup>24</sup> ; <0.001 <sup>25</sup> ; 0.079 <sup>26</sup> ; <0.001 <sup>27</sup> ;<br><0.001 <sup>28</sup> ; <0.001 <sup>34</sup> ; <0.001 <sup>35</sup> ; <0.001 <sup>36</sup> ; 0.149 <sup>37</sup> ;<br><0.001 <sup>38</sup> ; 0.803 <sup>45</sup> ; <0.001 <sup>46</sup> ; <0.001 <sup>47</sup> ; 0.090 <sup>48</sup> ; <0.001 <sup>56</sup> ;<br><0.001 <sup>57</sup> ; 0.138 <sup>58</sup> ; <0.001 <sup>67</sup> ; <0.001 <sup>68</sup> ; <0.001 <sup>78</sup>      |
| Sleep<br>duration on<br>working<br>days (h)<br>median (IQR) | <0.001 <sup>12</sup> ; <0.001 <sup>13</sup> ; 0.020 <sup>14</sup> ; <0.001 <sup>15</sup> ; <0.001 <sup>16</sup> ;<br><0.001 <sup>17</sup> ; 0.002 <sup>18</sup> ; <0.001 <sup>23</sup> ; <0.001 <sup>24</sup> ; <0.001 <sup>25</sup> ;<br><0.001 <sup>26</sup> ; 0.001 <sup>27</sup> ; <0.001 <sup>28</sup> ; <0.001 <sup>34</sup> ; <0.823 <sup>35</sup> ; 0.747 <sup>36</sup> ;<br>0.001 <sup>37</sup> ; <0.001 <sup>38</sup> ; <0.001 <sup>45</sup> ; <0.001 <sup>46</sup> ; <0.001 <sup>47</sup> ;<br><0.001 <sup>48</sup> ; 0.882 <sup>56</sup> ; 0.024 <sup>57</sup> ; <0.001 <sup>58</sup> ; 0.082 <sup>67</sup> ; <0.001 <sup>68</sup> ;<br><0.001 <sup>78</sup>   |



|                                                            |                                                                                                                                                                                                                                                                                                                                                                                                                                                                                                                                                                                                                                                                         |
|------------------------------------------------------------|-------------------------------------------------------------------------------------------------------------------------------------------------------------------------------------------------------------------------------------------------------------------------------------------------------------------------------------------------------------------------------------------------------------------------------------------------------------------------------------------------------------------------------------------------------------------------------------------------------------------------------------------------------------------------|
| Sleep duration on non-working days (h)                     | <0.001 <sup>12</sup> ; <0.001 <sup>13</sup> ; <0.001 <sup>14</sup> ; 0.126 <sup>15</sup> ; <0.001 <sup>16</sup> ; 0.414 <sup>17</sup> ; 0.021 <sup>18</sup> ; <0.001 <sup>23</sup> ; <0.001 <sup>24</sup> ; <0.001 <sup>25</sup> ; <0.001 <sup>26</sup> ; <0.001 <sup>27</sup> ; <0.001 <sup>28</sup> ; <0.001 <sup>34</sup> ; <0.001 <sup>35</sup> ; <0.001 <sup>36</sup> ; <0.001 <sup>37</sup> ; 0.016 <sup>38</sup> ; 0.019 <sup>45</sup> ; 0.570 <sup>46</sup> ; <0.001 <sup>47</sup> ; <0.001 <sup>48</sup> ; median (IQR) 0.087 <sup>56</sup> ; 0.055 <sup>57</sup> ; 0.003 <sup>58</sup> ; <0.001 <sup>67</sup> ; <0.001 <sup>68</sup> ; 0.094 <sup>78</sup>    |
| Total METs per week <sup>†</sup>                           | <0.001 <sup>12</sup> ; 0.843 <sup>13</sup> ; <0.001 <sup>14</sup> ; 0.042 <sup>15</sup> ; 0.002 <sup>16</sup> ; <0.001 <sup>17</sup> ; <0.001 <sup>18</sup> ; <0.001 <sup>23</sup> ; <0.001 <sup>24</sup> ; <0.001 <sup>25</sup> ; 0.398 <sup>26</sup> ; <0.001 <sup>27</sup> ; <0.001 <sup>28</sup> ; <0.001 <sup>34</sup> ; 0.045 <sup>35</sup> ; 0.004 <sup>36</sup> ; <0.001 <sup>37</sup> ; median (IQR) <0.001 <sup>38</sup> ; 0.005 <sup>45</sup> ; <0.001 <sup>46</sup> ; <0.001 <sup>47</sup> ; 0.034 <sup>48</sup> ; <0.001 <sup>56</sup> ; <0.001 <sup>57</sup> ; <0.001 <sup>58</sup> ; <0.001 <sup>67</sup> ; <0.001 <sup>68</sup> ; <0.001 <sup>78</sup>  |
| Daily mobile use (h)                                       | <0.001 <sup>12</sup> ; <0.001 <sup>13</sup> ; <0.001 <sup>14</sup> ; 0.432 <sup>15</sup> ; 0.678 <sup>16</sup> ; 0.514 <sup>17</sup> ; <0.001 <sup>18</sup> ; <0.001 <sup>23</sup> ; <0.001 <sup>24</sup> ; <0.001 <sup>25</sup> ; 0.002 <sup>26</sup> ; <0.001 <sup>27</sup> ; <0.001 <sup>28</sup> ; <0.001 <sup>34</sup> ; <0.001 <sup>35</sup> ; <0.001 <sup>36</sup> ; <0.001 <sup>37</sup> ; 0.363 <sup>38</sup> ; <0.001 <sup>45</sup> ; <0.001 <sup>46</sup> ; <0.001 <sup>47</sup> ; median (IQR) <0.001 <sup>48</sup> ; 0.337 <sup>56</sup> ; 0.759 <sup>57</sup> ; 0.001 <sup>58</sup> ; 0.372 <sup>67</sup> ; <0.001 <sup>68</sup> ; <0.001 <sup>78</sup>   |
| Daily study time (h)                                       | <0.001 <sup>12</sup> ; <0.001 <sup>13</sup> ; 0.246 <sup>14</sup> ; <0.001 <sup>15</sup> ; <0.001 <sup>16</sup> ; <0.001 <sup>17</sup> ; 0.686 <sup>18</sup> ; <0.001 <sup>23</sup> ; <0.001 <sup>24</sup> ; <0.001 <sup>25</sup> ; <0.001 <sup>26</sup> ; <0.001 <sup>27</sup> ; <0.001 <sup>28</sup> ; <0.001 <sup>34</sup> ; <0.001 <sup>35</sup> ; <0.001 <sup>36</sup> ; <0.001 <sup>37</sup> ; <0.001 <sup>38</sup> ; <0.001 <sup>45</sup> ; <0.001 <sup>46</sup> ; median (IQR) <0.001 <sup>47</sup> ; 0.774 <sup>48</sup> ; 0.009 <sup>56</sup> ; 0.004 <sup>57</sup> ; <0.001 <sup>58</sup> ; 0.517 <sup>67</sup> ; 0.001 <sup>68</sup> ; <0.001 <sup>78</sup> |
| PSS-10 score median (IQR)                                  | <0.001 <sup>12</sup> ; 0.020 <sup>13</sup> ; <0.001 <sup>14</sup> ; 0.036 <sup>15</sup> ; 0.001 <sup>16</sup> ; <0.001 <sup>17</sup> ; <0.001 <sup>18</sup> ; 0.177 <sup>23</sup> ; <0.001 <sup>24</sup> ; 0.832 <sup>25</sup> ; 0.229 <sup>26</sup> ; <0.001 <sup>27</sup> ; <0.001 <sup>28</sup> ; <0.001 <sup>34</sup> ; 0.545 <sup>35</sup> ; 0.062 <sup>36</sup> ; <0.001 <sup>37</sup> ; <0.001 <sup>38</sup> ; 0.001 <sup>45</sup> ; 0.024 <sup>46</sup> ; <0.001 <sup>47</sup> ; 0.268 <sup>48</sup> ; 0.272 <sup>56</sup> ; <0.001 <sup>57</sup> ; <0.001 <sup>58</sup> ; <0.001 <sup>67</sup> ; 0.003 <sup>68</sup> ; <0.001 <sup>78</sup>                    |
| Students asking for more education on lifestyle and health | <0.001 <sup>12</sup> ; <0.001 <sup>13</sup> ; 0.899 <sup>14</sup> ; - <sup>15</sup> ; <0.001 <sup>16</sup> ; 0.863 <sup>17</sup> ; <0.001 <sup>18</sup> ; 0.113 <sup>23</sup> ; 0.001 <sup>24</sup> ; - <sup>25</sup> ; 0.008 <sup>26</sup> ; <0.001 <sup>27</sup> ; 0.001 <sup>28</sup> ; <0.001 <sup>34</sup> ; - <sup>35</sup> ; 0.091 <sup>36</sup> ; <0.001 <sup>37</sup> ; 0.018 <sup>38</sup> ; - <sup>45</sup> ; <0.001 <sup>46</sup> ; 0.978 <sup>47</sup> ; <0.001 <sup>48</sup> ; - <sup>56</sup> ; - <sup>57</sup> ; - <sup>58</sup> ; <0.001 <sup>67</sup> ; 0.566 <sup>68</sup> ; <0.001 <sup>78</sup>                                                    |
| n (%)                                                      |                                                                                                                                                                                                                                                                                                                                                                                                                                                                                                                                                                                                                                                                         |

Legend. Man-Whitney U test was used as a post hoc test for numerical variables, and chi-square test was used as a post hoc test for categorical variables. A Bonferroni correction for post-hoc analysis was applied, yielding P value of  $\leq 0.002$  to be considered as statistically significant result.

Study sites correspond to numbers in superscript of the post-hoc P values: <sup>1</sup>Croatia, <sup>2</sup>Foggia, Italy, <sup>3</sup>Pavia, Italy, <sup>4</sup>Lebanon, <sup>5</sup>Poland, <sup>6</sup>Romania, <sup>7</sup>Spain, <sup>8</sup>Turkey. Hence, symbol <sup>12</sup> denotes comparison between Croatia and Foggia, symbol <sup>13</sup> denotes comparison between Croatia and Pavia, symbol <sup>14</sup> denotes comparison between Croatia and Lebanon, symbol <sup>15</sup> denotes comparison between Croatia and Poland, symbol <sup>16</sup> denotes comparison between Croatia and Romania, symbol <sup>17</sup> denotes comparison between Croatia and Spain, symbol <sup>18</sup> denotes comparison between Croatia and Turkey, symbol <sup>23</sup> denotes comparison between Foggia and Pavia, symbol <sup>24</sup> denotes comparison between Foggia and Lebanon, symbol <sup>25</sup> denotes comparison between Foggia and Poland, symbol <sup>26</sup> denotes comparison between Foggia and Romania, symbol <sup>27</sup> denotes comparison between Foggia and Spain, symbol <sup>28</sup> denotes comparison between Foggia and Turkey, symbol <sup>34</sup> denotes comparison between Pavia and Lebanon, symbol <sup>35</sup> denotes comparison between Pavia and Poland, symbol <sup>36</sup> denotes comparison between Pavia and Romania, symbol <sup>37</sup> denotes comparison between Pavia and Spain, symbol <sup>38</sup> denotes comparison between Pavia and Turkey, symbol <sup>45</sup> denotes comparison between Lebanon and Poland, symbol <sup>46</sup> denotes comparison between Lebanon and Romania, symbol <sup>47</sup> denotes comparison between Lebanon and Spain, symbol <sup>48</sup> denotes comparison between Lebanon and Turkey, symbol <sup>56</sup> denotes comparison between Poland and Romania, symbol <sup>57</sup> denotes comparison between Poland and Spain, symbol <sup>58</sup> denotes comparison between Poland and Turkey, symbol <sup>67</sup> denotes comparison between Romania and Spain, symbol <sup>68</sup> denotes comparison between Romania and Turkey, symbol <sup>78</sup> denotes comparison between Spain and Turkey.
